# Supplementary material for: A powerful antitumor “trident”: the combination of radio-, immuno- and anti-angiogenesis therapy based on mesoporous silica single coated gold nanoparticles
Source: Royal Society of Chemistry journal article supplement (doi:10.1039/d2tb02046g), 2022-12-17
Supplement: d2tb02046g1.pdf [file d2tb02046g1.pdf]

## Supporting Information

### **Powerful Antitumor “Trident”: combination of Radio-, Immuno- and Anti-angiogenesis therapy based on mesoporous silica single coated gold nanoparticles**

*Cheng Wang<sup>1,†</sup>, Lingyun Wu<sup>2,†</sup>, Huili Yuan<sup>1</sup>, Hao Yu<sup>2</sup>, Jiaqi Xu<sup>2</sup>, Si Chen<sup>1,\*</sup>, Senxiang Yan<sup>2,\*</sup>, and Xu Wang<sup>1,\*</sup>*

*<sup>1</sup> College of Materials Science & Engineering, Zhejiang University of Technology, Hangzhou 310014, P. R. China.*

*E-mail: [chensi@zjut.edu.cn](mailto:chensi@zjut.edu.cn)*

*<sup>2</sup> The First Affiliated Hospital, Zhejiang University School of Medicine, Hangzhou 310003, P. R. China.*

*Email: [yansenxiang@zju.edu.cn](mailto:yansenxiang@zju.edu.cn)*

*† these authors contribute equally to this work*

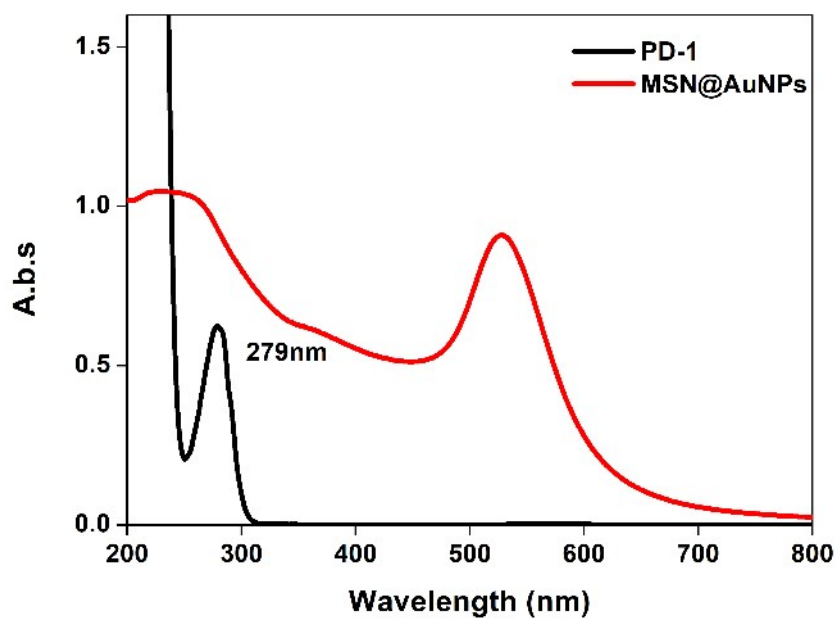

Figure S1. The UV-vis spectrum of MSN@AuNPs and PD-1

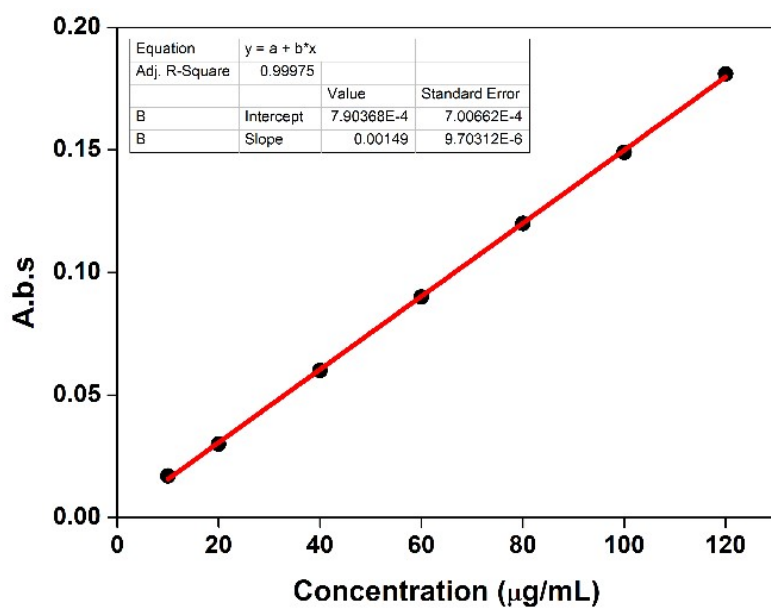

Figure S2. The working curve of PD-1

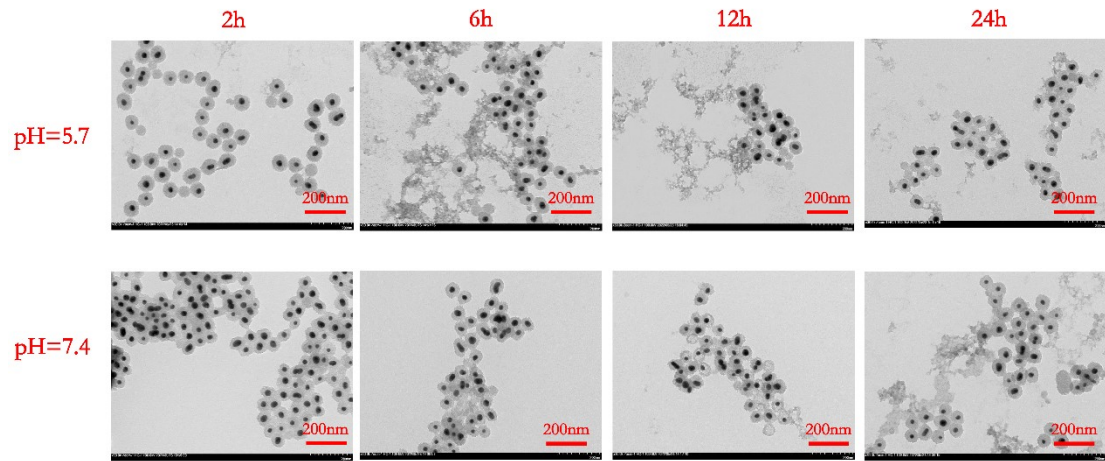

Figure S3. The TEM photos of nanomedicine addressing in different environment (pH5.7 or pH7.4, 37°C)
